# Supplementary material for: The Impact of Optical Berry Sorting on Red Wine Composition and Sensory Properties
Source: MDPI journal article supplement (doi:10.3390/foods10020402), 2021-02-12
Supplement: s1 [file s1]

**Supplementary Materials:** The following are available online at [www.mdpi.com/xxx/s1](http://www.mdpi.com/xxx/s1), Figure S1: Biplot of BA treatments including all ethyl ester and higher alcohols. A correlation matrix was used; S2: Cobweb plot of mean intensity scores from descriptive analysis of Grenache wines. An asterisk indicates compounds that differed significantly among treatments ( $n = 11$ ,  $p < 0.05$ ); S3: Cobweb plot of mean intensity scores from descriptive analysis of Barbera wines. Asterisk indicates attributes that differed significantly among treatments ( $n = 10$ ,  $p < 0.05$ ); S4: Cobweb plot of mean intensity scores from descriptive analysis of Barbera wines. Asterisk indicates attributes that differed significantly among treatments ( $n = 10$ ,  $p < 0.05$ ); Table S1: Compounds measured by HS-SPME-GC-MS analysis of wines with CAS number, retention time, and ions chosen for selected ion monitoring (SIM); S2: MANOVA results from descriptive analysis of GN wines; S3: MANOVA results from descriptive analysis of CS wines; S4: MANOVA results from descriptive analysis of CS wines.

**Table S1.** Compounds measured by HS-SPME-GC-MS analysis of wines with CAS number, retention time, and ions chosen for selected ion monitoring (SIM).

| Compound               | CAS #      | Retention Time (min) | SIM Ions                |
|------------------------|------------|----------------------|-------------------------|
| Ethyl acetate          | 141-78-6   | 3.053                | 43, 61, 88              |
| Ethyl isobutyrate      | 97-62-1    | 4.443                | 43, 71, 86, 116         |
| Diacetyl               | 431-03-8   | 4.782                | 43, 71, 86, 116         |
| Ethyl butanoate        | 105-54-4   | 6.508                | 71, 88, 116             |
| Ethyl 2-methylbutyrate | 7452-79-1  | 7.046                | 57, 102, 130            |
| Ethyl 3-methylbutyrate | 108-64-5   | 7.632                | 55, 88, 130             |
| Isobutanol             | 78-83-1    | 8.717                | 43, 55, 74              |
| Isoamyl acetate        | 123-92-2   | 9.895                | 55, 87, 130             |
| $\beta$ -Myrcene       | 123-35-3   | 11.639               | 69, 93, 136             |
| $\alpha$ -Terpinene    | 99-86-5    | 12.080               | 93, 121, 136            |
| Limonene               | 138-86-3   | 12.956               | 68, 93, 136             |
| Isoamyl alcohol        | 123-51-3   | 13.856               | 57, 70, 88              |
| Ethyl hexanoate        | 123-66-0   | 15.076               | 88, 115, 144            |
| $\alpha$ -Cymene       | 99-87-6    | 16.485               | 91, 119, 134            |
| Hexyl acetate          | 142-13-0   | 16.931               | 43, 45, 56, 84, 88, 101 |
| Acetoin                | 513-86-0   | 17.231               | 43, 45, 56, 84, 88, 101 |
| Ethyl lactate          | 687-47-8   | 20.201               | 45, 75                  |
| (-)-cis-Rose oxide     | 16409-43-1 | 20.460               | 69, 139, 154            |
| Hexanol                | 111-27-3   | 20.701               | 69, 84, 101             |
| trans-3-Hexen-1-ol     | 928-97-2   | 21.167               | 41, 57, 67, 82, 100     |
| cis-3-Hexen-1-ol       | 928-96-1   | 22.087               | 41, 57, 67, 82, 100     |
| Ethyl octanoate        | 106-32-1   | 24.578               | 88, 101, 172            |
| 1-Octen-3-ol*          | 3391-86-4  | 25.230               | 57, 72, 127             |
| Nerol oxide*           | 1786-08-9  | 25.902               | 68, 83, 152             |
| Benzaldehyde           | 100-52-7   | 28.164               | 77, 105, 106            |
| $\beta$ -Linalool      | 78-70-6    | 29.523               | 71, 93, 154             |
| 2-Undecanone (IS)      | 112-12-9   | 31.551               | 58, 71, 170             |
| $\beta$ -Cyclocitral*  | 432-25-78  | 32.194               | 123, 137, 152           |

|                         |            |        |                            |
|-------------------------|------------|--------|----------------------------|
| Ethyl decanoate         | 110-38-3   | 33.286 | 88, 105, 200               |
| $\beta$ -Citronellol    | 106-22-9   | 38.264 | 69, 82, 156                |
| Nerol*                  | 106-25-2   | 39.458 | 69, 93, 154                |
| $\beta$ -Damascenone    | 23726-93-4 | 40.135 | 69, 121, 190               |
| Geraniol                | 106-24-1   | 41.238 | 69, 93, 154                |
| Benzyl alcohol          | 100-51-6   | 42.177 | 79, 91, 104, 107, 108, 178 |
| Ethyl dihydrocinnamate* | 2021-28-5  | 42.556 | 79, 91, 104, 107, 108, 178 |
| 2-Phenethyl alcohol     | 60-12-8    | 43.422 | 65, 91, 122                |
| Nerolidol               | 40716-66-3 | 48.208 | 65, 93, 222                |
| Octanoic acid           | 124-07-2   | 48.690 | 60, 73, 115                |

\*Indicates compounds that were not detected in Grenache wines.

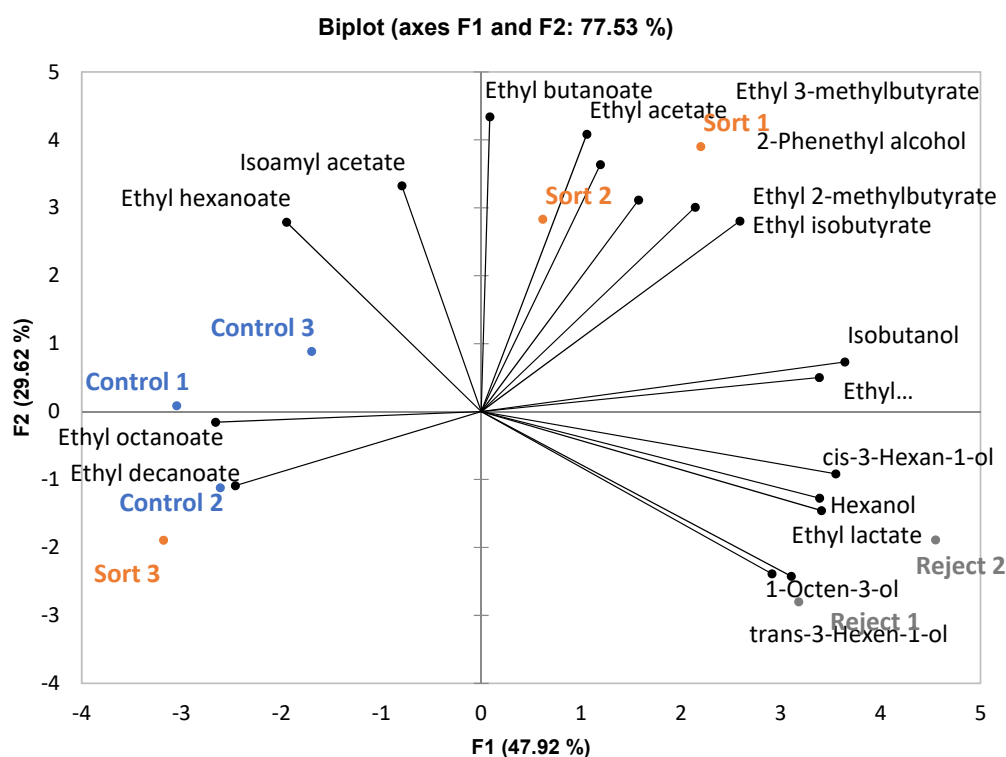

**Figure S1.** Biplot of BA treatments including all ethyl ester and higher alcohols. A correlation matrix was used.

**Table S2.** MANOVA results from descriptive analysis of GN wines.

|                     | <b>Judge</b> | <b>Product</b> | <b>Rep</b> |
|---------------------|--------------|----------------|------------|
| Lambda              | 0.369        | 0.914          | 0.842      |
| F (Observed values) | 14.988       | 0.819          | 1.640      |
| DF1                 | 20           | 20             | 20         |
| DF2                 | 175          | 175            | 175        |
| F (Observed values) | 1.631        | 1.631          | 1.631      |
|                     | <            |                |            |
| p-value             | 0.0001       | 0.689          | 0.048      |

**Table S3.** MANOVA results from descriptive analysis of BA wines.

|                     | <b>Judge</b> | <b>Product</b> | <b>Rep</b> |
|---------------------|--------------|----------------|------------|
| Lambda              | 0.235        | 0.872          | 0.774      |
| F (Observed values) | 18.863       | 0.852          | 1.695      |
| DF1                 | 26           | 26             | 26         |
| DF2                 | 151          | 151            | 151        |
| F (Observed values) | 1.569        | 1.569          | 1.569      |
| p-value             | < 0.0001     | 0.673          | 0.027      |

**Table S4.** MANOVA results from descriptive analysis of CS wines.

|                     | <b>Judge</b> | <b>Product</b> | <b>Rep</b> |
|---------------------|--------------|----------------|------------|
| Lambda              | 0.679        | 0.879          | 0.858      |
| F (Observed values) | 3.334        | 0.967          | 1.162      |
| DF1                 | 22           | 22             | 22         |
| DF2                 | 155          | 155            | 155        |
| F (Observed values) | 1.611        | 1.611          | 1.611      |
|                     | <            |                |            |
| p-value             | 0.0001       | 0.509          | 0.290      |

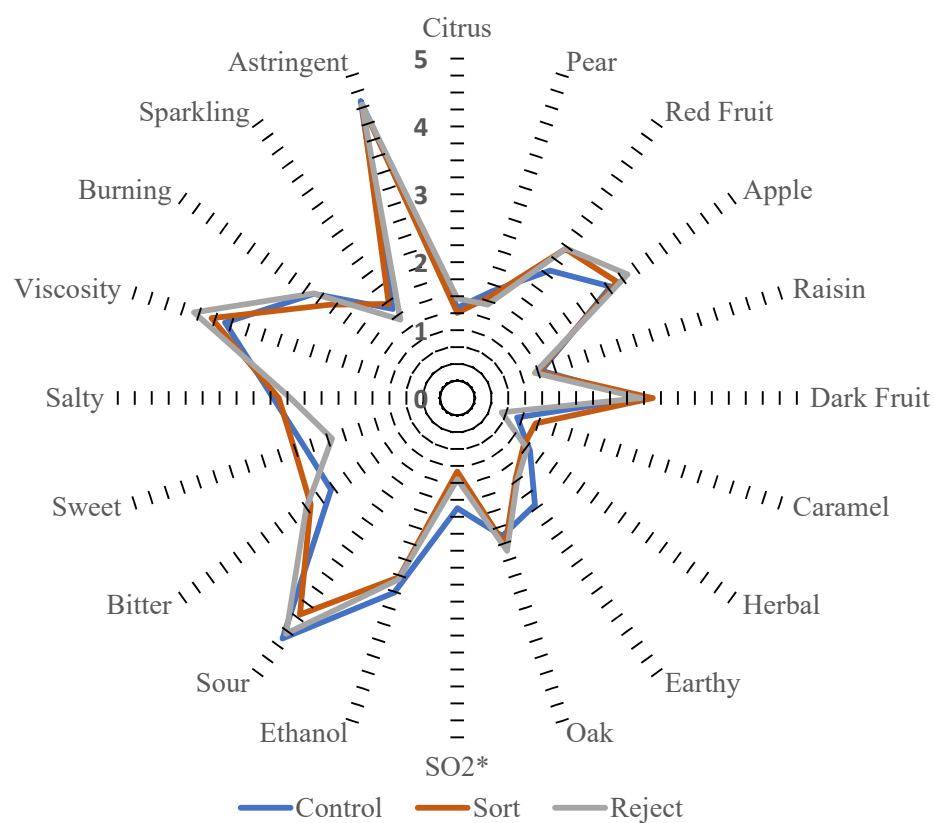

**Figure S2.** Cobweb plot of mean intensity scores from descriptive analysis of Grenache wines. An asterisk indicates compounds that differed significantly among treatments ( $n = 11$ ,  $p < 0.05$ ).

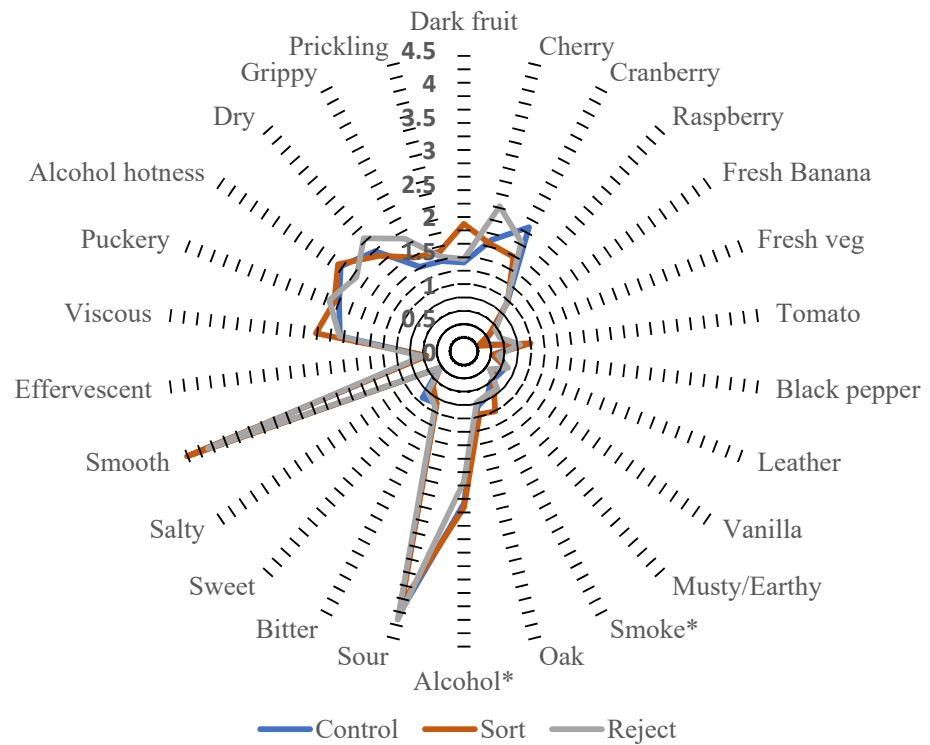

**Figure S3.** Cobweb plot of mean intensity scores from descriptive analysis of Barbera wines. Asterisk indicates attributes that differed significantly among treatments ( $n = 10$ ,  $p < 0.05$ ).

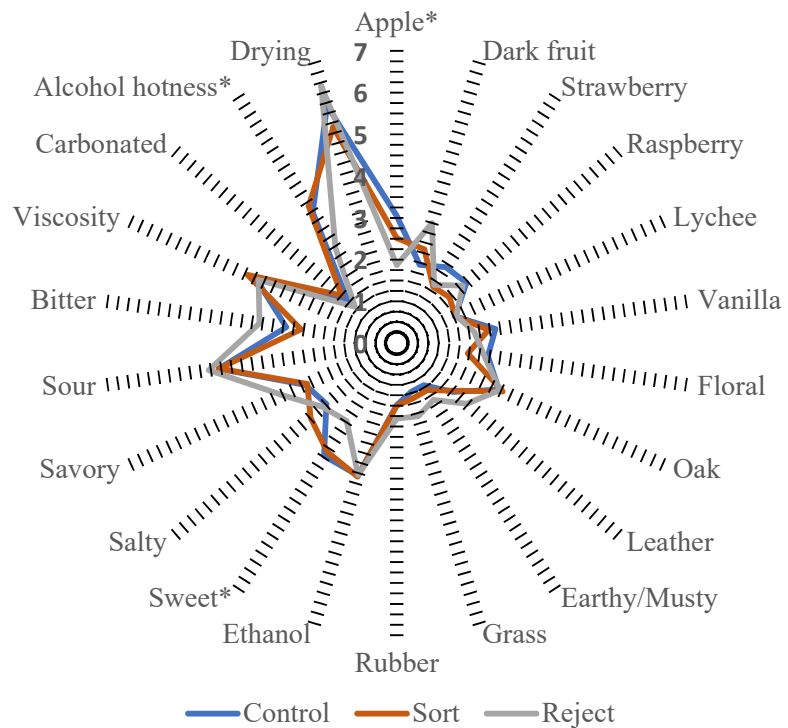

**Figure S4.** Cobweb plot of mean intensity scores from descriptive analysis of Barbera wines. Asterisk indicates attributes that differed significantly among treatments ( $n = 10$ ,  $p < 0.05$ ).
